# Supplementary material for: Listening to the Whispers in Neuroimmune Crosstalk: A Comprehensive Workflow to Investigate Neurotrophin Receptor p75NTR Under Endogenous, Low Abundance Conditions
Source: Front Immunol. 2021 Apr 16;12:648283. doi: 10.3389/fimmu.2021.648283 (PMC8085361; doi:10.3389/fimmu.2021.648283)
Supplement: Supplementary Table 1 — Ordering information of applied reagents and chemicals. [file Table_1.xlsx]

## Sheet: Supplementary table 1
Material	Vendor	Order ID
Anti-rabbit IgG, HRP-linked Antibody	Cell Signaling Technologies	7074
Bovine serum albumin	Merck	A7906
Coverslips	Carl Roth	LH23.1
Dapi	Applichem	A1001
DMEM, high glucose	Thermo Fisher Scientific	11960044
EDTA, 0.5M	Merck	3690
F(ab)2 Donkey anti-Rabbit IgG, HRP-linked	GE Healthcare	NA9340
FcR blocking reagent, human	Miltenyi Biotec	130-059-901
Fetal calf serum	Merck	S0615
GlutaMax supplement	Thermo Fisher Scientific	35050-038
Glycerol	VWR	24388295
Glycine	Applichem	A1067
HBSS, 10x	Thermo Fisher Scientific	14065-049
HEPES	Merck	115231
Hoechst 33342	Thermo Fisher Scientific	H21492
Hybridoma-SFM	Thermo Fisher Scientific	12045-076
Hydrochloric acid	Merck	100317
IMDM	Thermo Fisher Scientific	12440-053
Immobilon-P-PVDF transfer membrane	Merck	IPVH00010
Lumi-Light PLUS western blotting substrate	Roche	12015196001
MES SDS running buffer, 20x	Thermo Fisher Scientific	NP0002
Methanol	Applichem	1310911214
Nonfat dry milk powder	Applichem	A0830
Normal goat serum	Thermo Fisher Scientific	PCN5000
NuPage 4-12% Bis-Tris gels	Thermo Fisher Scientific	NP0321BOX
Para-Formaldehyde	Merck	441244
PBS, 10x	Thermo Fisher Scientific	14080-048
PBS, 1x	Merck	D8537
PEI, branched	Merck	408727
Penicillin-Streptomycin	Thermo Fisher Scientific	15140-122
pMD2.G	Addgene	12259
Poly-L-lysine solution, 0.01%	Merck	P4707
pReceiver-Lv203_hsNGFR C-Flag-SV40-eGFP-IRES-puromycin	Genecopoeia	Ex-A0100-Lv203
Protamine sulfate	Merck	P3369
Protease inhibitor cocktail	Roche	5892970001
Protein G Dynabeads	Thermo Fisher Scientific	10003D
psPAX2	Addgene	12260
RMPI-1640	Thermo Fisher Scientific	31870-074
Sodium chloride	VWR	27810295
Sodium dodecyl sulfate	Carl Roth	2326.2
Sodium pyruvate	Thermo Fisher Scientific	11360039
Spectra Multicolor broad range protein ladder	Thermo Fisher Scientific	26623
Transfer buffer, 20x	Thermo Fisher Scientific	NP0006
Tris	Applichem	A2264
Triton X-100	Merck	T9284
Trypan blue stain	Thermo Fisher Scientific	15250-061
Trypsin-EDTA	Thermo Fisher Scientific	15400-054
Tween 20	Merck	P2287
Vectashield Antifade mounting medium	Vector Laboratories	H-1000-10
WGA (wheat germ agglutinin)-AF594	Thermo Fisher Scientific	W11262
